# Supplementary material
Source: Royal Society of Chemistry journal article supplement (doi:10.1039/d6nj00999a)
Supplement: d6nj00999a1.pdf [file d6nj00999a1.pdf]

*Supporting information*

**Ag@FONPs Nanohybrids Derived from Sulfur-Functionalized Dicarbene  
Ligand: Efficient Catalysts and Selective Azide Ion Sensors**

Rohitash Kumar<sup>1†</sup>, Kopal Garg<sup>1†</sup>, Vaishali Yadav<sup>1</sup>, Rishu<sup>2\*</sup>, Vimal K. Bhardwaj<sup>1\*</sup>

† Authors have equal contribution

<sup>1</sup>Inorganic Green Chemistry Lab, Department of Chemistry, National Institute of Technology, Jalandhar, Punjab-144008, India

<sup>2</sup>Department of Chemistry, Mehr Chand Mahajan DAV College for Women, Sector 36 A, Chandigarh 160036, India

Email: [bhardwajvk@nitj.ac.in](mailto:bhardwajvk@nitj.ac.in)

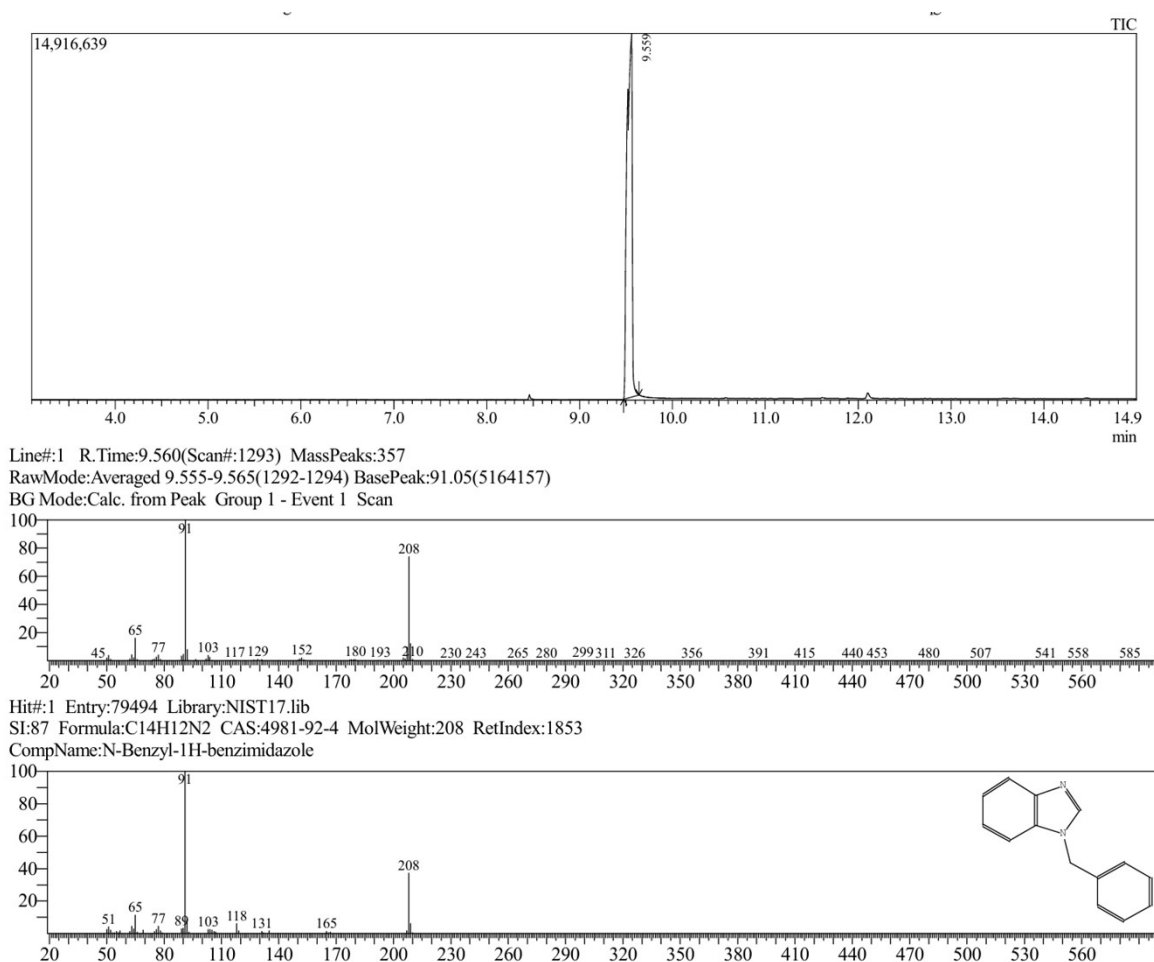

Figure ESI 1. GC-MS Analysis of 1- Benzyl benzimidazole

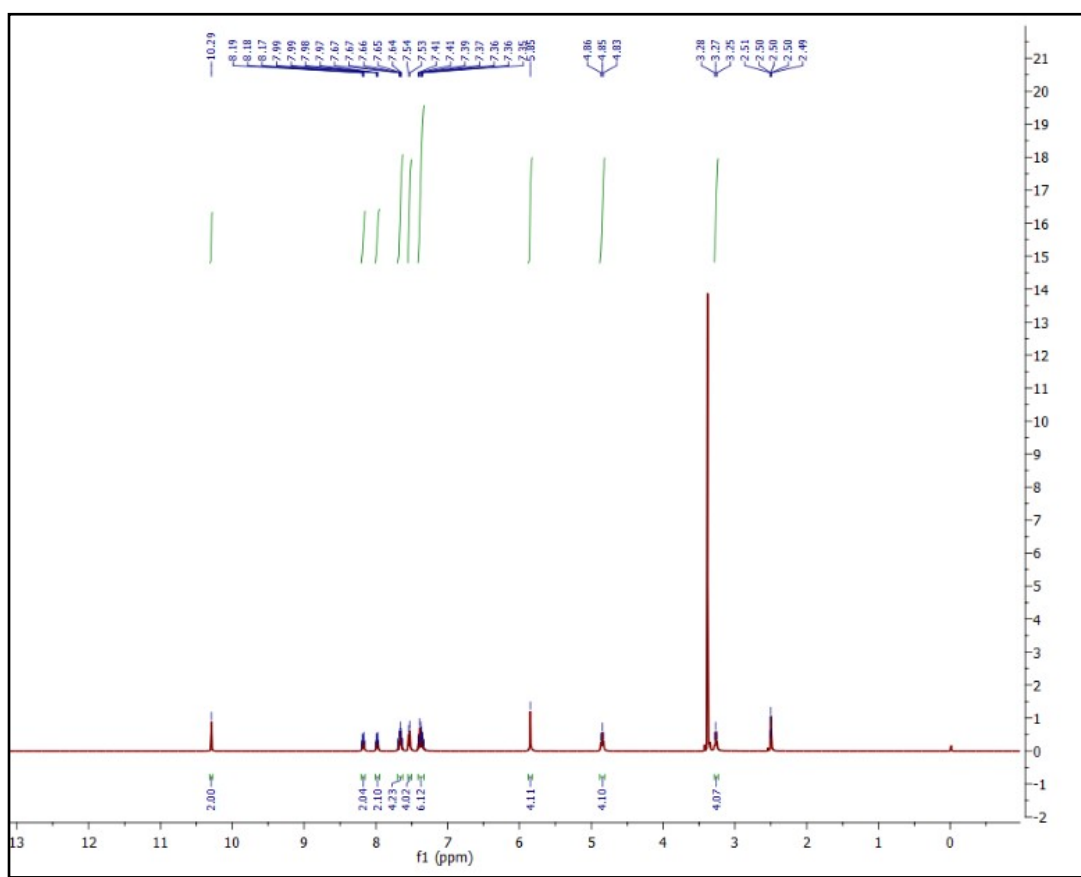

Figure ESI 2.  $^1\text{H}$  NMR spectra of the synthesized compound (C)(400 MHz,  $\text{DMSO-}d_6$ )

ESI Table 1. Comparison of the structural features, synthesis strategy, sensing performance, and catalytic properties of the present Ag@FONPs system with recently reported Ag-based nanoparticle.

| <b>Sr. No.</b> | <b>System</b>                                           | <b>Organic Ligand</b>                                        | <b>Target Application</b>                                   | <b>Key Performance</b>                      | <b>Ref.</b> |
|----------------|---------------------------------------------------------|--------------------------------------------------------------|-------------------------------------------------------------|---------------------------------------------|-------------|
| 1.             | Schiff base-stabilized Ag nanoparticles                 | Schiff base-mediated stabilization of AgNPs                  | Antibacterial and catalytic applications                    | Catalytic activity toward bacterial systems | [1]         |
| 2.             | Organic–inorganic Ag nanohybrids                        | Organic tripodal Schiff base ligand supported Ag nanohybrids | Cu <sup>2+</sup> chromogenic sensing and biological studies | Selective Cu <sup>2+</sup> detection        | [2]         |
| 3.             | Fluorescent Schiff-base hybrid nanoparticles            | Fluorescent Schiff-base nanoparticle assembly                | Silver extraction and biological activity                   | Metal extraction efficiency                 | [3]         |
| 4.             | Organic nanoparticle-based Sr <sup>2+</sup> chemosensor | Organic nanoparticle fluorescent probe                       | Sr <sup>2+</sup> sensing                                    | Fluorescence sensing response               | [4]         |
| 5.             | Hybrid nano assembly fluorescent probe                  | Organic–inorganic nanoparticle assembly                      | Amitriptyline fluorescence sensing                          | Turn-on fluorescence response               | [5]         |
| 6.             | Organic–inorganic nanohybrids                           | Fluorescent hybrid nanohybrids                               | Cr <sup>3+</sup> recognition                                | Selective ion recognition                   | [6]         |
| 7.             | Conventional Ag nanoparticles                           | Chemical reduction methods                                   | Catalytic reduction and antimicrobial uses                  | Good catalytic activity                     | [7]         |

|    |                      |                                            |                                                             |                                                                                                                          |                |
|----|----------------------|--------------------------------------------|-------------------------------------------------------------|--------------------------------------------------------------------------------------------------------------------------|----------------|
| 8. | Ag@FONPs nanohybrids | N-Heterocyclic carbene-based pincer ligand | Selective azide sensing, 4-NP reduction, and MO degradation | Complete 4-NP reduction in 18 min, ~80% MO degradation in 10 min, selective N <sub>3</sub> <sup>-</sup> turn-on sensing. | [In this work] |
|----|----------------------|--------------------------------------------|-------------------------------------------------------------|--------------------------------------------------------------------------------------------------------------------------|----------------|

## Reference

1. Singh, A., Bhardwaj, V. K., Kaur, G., Kaur, K., Singh, N., & Bakshi, M. S. (2014). Organic–inorganic nanohybrids and their applications in silver extraction, chromogenic Cu<sup>2+</sup> detection in biological systems, and hemolytic assay. *RSC advances*, *4*(40), 21079-21088.
2. Kumar, R., Anu, Yadav, V., Singh, V., Pant, A., Jana, A. K., & Bhardwaj, V. K. (2025). Synthesis of Fluorescent Schiff Base Hybrid Nanoparticles for Silver Extraction and their Biological Activity. *ChemistrySelect*, *10*(40), e03415.
3. Kaur, S., Kaur, A., Kaur, N., & Singh, N. (2014). Development of chemosensor for Sr<sup>2+</sup> using organic nanoparticles: application of sensor in product analysis for oral care. *Organic & Biomolecular Chemistry*, *12*(41), 8230-8238.
4. Saini, A., Kaur, R., Singh, N., Kuwar, A., & Kaur, N. (2018). High performance fluorescent turn-on probe for amitriptyline based on hybrid nanoassembly of organic–inorganic nanoparticles. *ACS Applied Bio Materials*, *2*(1), 135-143.
5. Viviana, P. B., Huerta-Aguilar, C. A., Singh, N., & Pandiyan, T. (2018). Selective recognition of Cr<sup>3+</sup> in multivitamin formulations in aqueous medium by fluorescent organic–inorganic nanohybrids. *Research on Chemical Intermediates*, *44*(5), 3179-3197.
6. Wei, Z., Mullaj, K., Price, A., Wei, K., Luo, Q., Thanneeru, S., Sun S., & He, J. (2022). Polymer N-heterocyclic carbene (NHC) ligands for silver nanoparticles. *ACS Applied Materials & Interfaces*, *14*(49), 55227-55237.
